# Supplementary material for: Association between SNPs in microRNAs and microRNAs-Machinery Genes with Susceptibility of Leprosy in the Amazon Population
Source: MDPI journal article supplement (doi:10.3390/ijms231810628), 2022-09-13
Supplement: s1 [file s1]

**Table S1. Genotypic distribution of the investigated polymorphisms for leprosy patients in comparison to control group to markers associated with susceptibility to leprosy.**

| Gene              | Genotype   | Case (%)  | Control (%) | <i>p</i> -value | Model         | OR (95%CI)             |
|-------------------|------------|-----------|-------------|-----------------|---------------|------------------------|
| <i>miR300</i>     | rs12894467 | 111       | 68          |                 |               |                        |
|                   | TT         | 44 (39.6) | 30 (44.1)   | 0.76            | TT vs TC + CC | 1.10(0.49-2.45)        |
|                   | CT         | 45 (40.5) | 26 (38.2)   |                 |               |                        |
|                   | CC         | 22 (19.8) | 12 (17.6)   | 0.82            | TT + TC vs CC | 1.10(0.49-2.45)        |
| <i>miR423</i>     | rs6505162  | 93        | 59          |                 |               |                        |
|                   | AA         | 27 (29.0) | 15 (25.4)   | 0.71            | AA vs AC + CC | 1.15(0.40-1.86)        |
|                   | AC         | 47 (50.5) | 32 (54.2)   |                 |               |                        |
|                   | CC         | 19 (20.4) | 12 (20.3)   | 0.87            | AA + AC vs CC | 1.07(0.45-2.53)        |
| <i>mir604</i>     | rs2368392  | 83        | 54          |                 |               |                        |
|                   | AA         | 42 (50.6) | 24 (44.4)   | 0.48            | AA vs AG + GG | 0.77(0.36-1.61)        |
|                   | AG         | 40 (48.2) | 29 (53.7)   |                 |               |                        |
|                   | GG         | 1 (1.2)   | 1 (1.9)     | 0.69            | AA + AG vs GG | 0.57(0.03-1.67)        |
| <i>pre-miR938</i> | rs2505901  | 109       | 68          |                 |               |                        |
|                   | TT         | 26 (23.9) | 27 (39.7)   | <b>&lt;0.01</b> | TT vs TC + CC | <b>0.40(0.20-0.81)</b> |
|                   | CT         | 53 (48.6) | 30 (44.1)   |                 |               |                        |
|                   | CC         | 30 (27.5) | 11 (16.2)   | <b>0.03</b>     | TT + CT vs CC | <b>0.41(0.18-0.95)</b> |

|                 |            |           |           |             |               |                        |
|-----------------|------------|-----------|-----------|-------------|---------------|------------------------|
| <i>miR100</i>   | rs1834306  | 93        | 58        |             |               |                        |
|                 | AA         | 44 (47.3) | 25 (43.1) | 0.60        | AA vs AG + GG | 0.83(0.42-1.66)        |
|                 | AG         | 36 (38.7) | 26 (44.8) |             |               |                        |
|                 | GG         | 13 (14.0) | 7 (12.1)  | 0.99        | AA + AG vs GG | 1.01(0.36-2.77)        |
| <i>miR219A1</i> | rs213210   | 140       | 70        |             |               |                        |
|                 | AA         | 91 (81.2) | 58 (84.1) | 0.60        | AA vs AG + GG | 1.25(0.54-2.86)        |
|                 | AG         | 21 (18.8) | 9 (13.0)  |             |               |                        |
|                 | GG         | 0 (0.0)   | 2 (2.9)   | 0.14        | AA + AG vs GG | 0.00 (0.00)            |
| <i>DROSHA</i>   | rs639174   | 101       | 64        |             |               |                        |
|                 | CC         | 32 (31.7) | 30 (46.9) | <b>0.02</b> | CC vs CT + TT | <b>0.45(0.23-0.89)</b> |
|                 | CT         | 51 (50.5) | 28 (43.8) |             |               |                        |
|                 | TT         | 18 (17.8) | 6 (9.4)   | 0.16        | CC + CT vs TT | 2.00(0.73-5.51)        |
| <i>miR453</i>   | rs56103835 | 109       | 69        |             |               |                        |
|                 | TT         | 60 (55.0) | 32 (46.4) | 0.42        | TT vs CT + CC | 0.77(0.41-1.45)        |
|                 | CT         | 38 (34.9) | 30 (43.5) |             |               |                        |
|                 | CC         | 11 (10.1) | 7 (10.1)  | 0.96        | TT + CT vs CC | 0.98(0.35-2.72)        |
| <i>miR196A2</i> | rs11614913 | 101       | 66        |             |               |                        |
|                 | CC         | 61 (60.4) | 31 (47.0) | 0.08        | CC vs CT + TT | 0.56(0.29-1.08)        |

|                    |            |           |           |             |               |                         |
|--------------------|------------|-----------|-----------|-------------|---------------|-------------------------|
|                    | CT         | 31 (30.7) | 30 (45.5) |             |               |                         |
|                    | TT         | 9 (8.9)   | 5 (7.6)   | 0.64        | CC + CT vs TT | 1.32(0.40-4.35)         |
| <i>AGO</i>         | rs636832   | 102       | 66        |             |               |                         |
|                    | GG         | 46 (45.1) | 39 (59.1) | <b>0.01</b> | GG vs GA + AA | <b>0.45(0.23-0.88)</b>  |
|                    | GA         | 43 (42.2) | 21 (31.8) |             |               |                         |
|                    | AA         | 13 (12.7) | 6 (9.1)   | 0.42        | GG + GA vs AA | 0.66(0.23-1.86)         |
| <i>pri-let-7a1</i> | rs10739971 | 30        | 37        |             |               |                         |
|                    | GG         | 15 (50.0) | 6 (22.2)  | <b>0.02</b> | GG vs GA + AA | <b>4.66(1.17-18.66)</b> |
|                    | GA         | 12 (40.0) | 14 (51.9) |             |               |                         |
|                    | AA         | 3 (10.0)  | 7 (25.9)  | <b>0.04</b> | GG + GA vs AA | <b>5.09(0.95-7.45)</b>  |
| <i>miR146A</i>     | rs2910164  | 108       | 69        |             |               |                         |
|                    | GG         | 47 (43.5) | 29 (42.0) | 0.67        | GG vs GC + CC | 0.87(0.46-1.65)         |
|                    | GC         | 54 (50.0) | 35 (50.7) |             |               |                         |
|                    | CC         | 7 (6.5)   | 5 (7.2)   | 0.66        | GG + GC vs CC | 1.31(0.22-2.59)         |
| <i>miR570</i>      | rs4143815  | 111       | 69        |             |               |                         |
|                    | GG         | 62 (55.9) | 46 (66.7) | 0.73        | GG vs GC + CC | 1.41(0.73-2.73)         |
|                    | GC         | 38 (34.2) | 19 (27.5) |             |               |                         |
|                    | CC         | 11 (9.9)  | 4 (5.8)   | 0.49        | GG + GC vs CC | 1.64(0.49-5.50)         |
| <i>miR200B</i>     | rs9660710  | 103       | 67        |             |               |                         |

|                 |            |           |           |             |               |                        |
|-----------------|------------|-----------|-----------|-------------|---------------|------------------------|
|                 | CC         | 79 (76.7) | 55 (82.1) | 0.62        | CC vs CA + AA | 1.22 (0.54-2.79)       |
|                 | CA         | 22 (21.4) | 12 (17.9) |             |               |                        |
|                 | AA         | 2 (1.9)   | 0 (0.0)   | 0.14        | CC + CA vs AA | 1.00 (0.00)            |
| <i>miR26-A1</i> | rs7372209  | 98        | 62        |             |               |                        |
|                 | CC         | 44 (44.9) | 33 (53.2) | 0.32        | CC vs CT + TT | 1.40(0.72-2.72)        |
|                 | CT         | 43 (43.9) | 23 (37.1) |             |               |                        |
|                 | TT         | 11 (11.2) | 6 (9.7)   | 0.41        | CC + CT vs TT | 1.59(0.51-4.94)        |
| <i>miR200C</i>  | rs12904    | 111       | 69        |             |               |                        |
|                 | GG         | 36 (32.4) | 11 (15.9) | <b>0.01</b> | GG vs AG + AA | <b>2.77(1.25-6.11)</b> |
|                 | AG         | 53 (47.7) | 45 (65.2) |             |               |                        |
|                 | AA         | 22 (19.8) | 13 (18.8) | 0.92        | GG + AG vs AA | 1.04(0.43-2.15)        |
| <i>DROSHA</i>   | rs10035440 | 110       | 69        |             |               |                        |
|                 | TT         | 80 (72.7) | 40 (58.0) | <b>0.03</b> | TT vs CT + CC | <b>2.04(1.03-4.02)</b> |
|                 | CT         | 29 (26.4) | 27 (39.1) |             |               |                        |
|                 | CC         | 1 (0.9)   | 2 (2.9)   | 0.27        | TT + CT vs CC | 3.82(0.32-3.10)        |
| <i>miR4513</i>  | rs2168518  | 112       | 69        |             |               |                        |
|                 | GG         | 51 (45.5) | 43 (62.3) | 0.19        | GG vs GA + AA | 1.56(0.80-3.04)        |
|                 | GA         | 53 (47.3) | 20 (29.0) |             |               |                        |
|                 | AA         | 8 (7.1)   | 6 (8.7)   | 0.38        | GG + AG vs AA | 1.68(0.53-5.34)        |

|                 |            |           |           |      |               |                  |
|-----------------|------------|-----------|-----------|------|---------------|------------------|
| <i>miR219-1</i> | rs107822   | 95        | 64        |      |               |                  |
|                 | CC         | 58 (61.1) | 37 (57.8) | 0.73 | CC vs CT + TT | 0.89(0.46-1.74)  |
|                 | CT         | 28 (29.5) | 23 (35.9) |      |               |                  |
|                 | TT         | 9 (9.5)   | 4 (6.2)   | 0.52 | CC + CT vs TT | 1.49(0.42-1.55)  |
| <i>miR2053</i>  | rs10505168 | 105       | 66        |      |               |                  |
|                 | TT         | 45 (42.9) | 25 (37.9) | 0.66 | TT vs TC + CC | 0.87(0.45-1.67)  |
|                 | TC         | 45 (42.9) | 29 (43.9) |      |               |                  |
|                 | CC         | 15 (14.3) | 12 (18.2) | 0.63 | TT + CT vs CC | 0.81(0.34-1.90)  |
| <i>miR499</i>   | rs3746444  | 109       | 69        |      |               |                  |
|                 | GG         | 79 (72.5) | 53 (76.8) | 0.62 | GG vs GA + AA | 1.20(0.57-2.50)  |
|                 | GA         | 26 (23.9) | 14 (20.3) |      |               |                  |
|                 | AA         | 4 (3.7)   | 2 (2.9)   | 0.61 | GG + GA vs AA | 1.62(0.24-10.69) |

\*Sample number; *P*-value, OR and 95%CI were obtained with logistic regression adjusted for genetic ancestry.

**Table S2. Genotypic distribution of the investigated polymorphisms for leprosy patients grouped in clinical form PB in comparison to the control group.**

| Gene          | Genotype   | PB (%)    | Control (%) | <i>p</i> -value | Model         | OR (95%CI)      |
|---------------|------------|-----------|-------------|-----------------|---------------|-----------------|
| <i>miR300</i> | rs12894467 | 55        | 68          |                 |               |                 |
|               | TT         | 18 (32.7) | 30 (44.1)   | 0.22            | TT vs TC + CC | 1.63(0.74-3.59) |
|               | TC         | 24 (43.6) | 26 (38.2)   |                 |               |                 |
|               | CC         | 13 (23.6) | 12 (17.6)   | 0.48            | TT + TC vs CC | 1.39(0.55-3.50) |
|               | Alelo T    | 0.44      | 0.53        |                 |               |                 |
|               | Alelo C    | 0.56      | 0.46        |                 |               |                 |
| <i>miR423</i> | rs6505162  | 49        | 59          |                 |               |                 |
|               | AA         | 12 (24.5) | 15 (25.4)   | 0.79            | AA vs AC + CC | 1.13(0.45-2.83) |
|               | AC         | 26 (53.1) | 32 (54.2)   |                 |               |                 |
|               | CC         | 11 (22.4) | 12 (20.3)   | 0.42            | AA + AC vs CC | 1.14(0.42-3.08) |
|               | Alelo A    | 0.38      | 0.39        |                 |               |                 |
|               | Alelo C    | 0.62      | 0.61        |                 |               |                 |
| <i>mir604</i> | rs2368392  | 43        | 54          |                 |               |                 |
|               | AA         | 21 (48.8) | 24 (44.4)   | 0.64            | AA vs AG + GG | 0.81(0.33-2.00) |
|               | AG         | 22 (51.2) | 29 (53.7)   |                 |               |                 |
|               | GG         | 0 (0.0)   | 1 (1.9)     | 0.23            | AA + AG vs GG | 0.00(0.00)      |
|               | Alelo A    | 0.74      | 0.71        |                 |               |                 |

|                   |           |           |           |                 |               |                        |
|-------------------|-----------|-----------|-----------|-----------------|---------------|------------------------|
|                   | Alelo G   | 0.26      | 0.29      |                 |               |                        |
| <i>pre-miR938</i> | rs2505901 | 53        | 68        |                 |               |                        |
|                   | TT        | 11 (20.8) | 27 (39.7) | <b>&lt;0.01</b> | TT vs TC + CC | <b>0.31(0.12-0.75)</b> |
|                   | TC        | 25 (47.2) | 30 (44.1) |                 |               |                        |
|                   | CC        | 17 (32.1) | 11 (16.2) | <b>0.01</b>     | TT + CT vs CC | <b>0.31(0.12-0.84)</b> |
|                   | Alelo T   | 0.44      | 0.62      |                 |               |                        |
|                   | Alelo C   | 0.56      | 0.38      |                 |               |                        |
| <i>miR100</i>     | rs1834306 | 48        | 58        |                 |               |                        |
|                   | AA        | 24 (50.0) | 25 (43.1) | 0.42            | AA vs AG + GG | 0.72(0.32-1.63)        |
|                   | AG        | 17 (35.4) | 26 (44.8) |                 |               |                        |
|                   | GG        | 7 (14.6)  | 7 (12.1)  | 0.77            | AA + AG vs GG | 1.19(0.37-3.87)        |
|                   | Alelo A   | 0.68      | 0.65      |                 |               |                        |
|                   | Alelo G   | 0.32      | 0.35      |                 |               |                        |
| <i>miR219A1</i>   | rs213210  | 55        | 69        |                 |               |                        |
|                   | AA        | 42 (76.4) | 58 (84.1) | 0.38            | AA + AG vs GG | 1.52(0.59-3.94)        |
|                   | AG        | 13 (23.6) | 9 (13.0)  |                 |               |                        |
|                   | GG        | 0 (0.00)  | 2 (2.9)   | 0.06            | AA vs AG + GG | 0.00 (0.00)            |
|                   | Alelo A   | 0.88      | 0.90      |                 |               |                        |
|                   | Alelo G   | 0.12      | 0.10      |                 |               |                        |

|                 |            |           |           |      |               |                 |
|-----------------|------------|-----------|-----------|------|---------------|-----------------|
| <i>DROSHA</i>   | rs639174   | 50        | 64        |      |               |                 |
|                 | CC         | 16 (32.0) | 30 (46.9) | 0.08 | CC vs CT + TT | 0.50(0.22-1.12) |
|                 | CT         | 27 (54.0) | 28 (43.8) |      |               |                 |
|                 | TT         | 7 (14.0)  | 6 (9.4)   | 0.60 | CC + CT vs TT | 0.72(0.21-2.31) |
|                 | Alelo C    | 0.59      | 0.69      |      |               |                 |
|                 | Alelo T    | 0.41      | 0.31      |      |               |                 |
| <i>miR453</i>   | rs56103835 | 54        | 69        |      |               |                 |
|                 | TT         | 30 (55.6) | 32 (46.4) | 0.52 | TT vs CT + CC | 0.78(0.36-1.67) |
|                 | CT         | 20 (37.0) | 30 (43.5) |      |               |                 |
|                 | CC         | 4 (7.4)   | 7 (10.1)  | 0.53 | TT + CT vs CC | 0.66(0.17-2.53) |
|                 | Alelo T    | 0.74      | 0.68      |      |               |                 |
|                 | Alelo C    | 0.26      | 0.32      |      |               |                 |
| <i>miR196A2</i> | rs11614913 | 52        | 66        |      |               |                 |
|                 | CC         | 32 (61.5) | 31 (47.0) | 0.12 | CC vs CT + TT | 0.53(0.24-1.19) |
|                 | CT         | 14 (26.9) | 30 (45.5) |      |               |                 |
|                 | TT         | 6 (11.5)  | 5 (7.6)   | 0.24 | CC + CT vs TT | 2.29(0.56-9.30) |
|                 | Alelo C    | 0.75      | 0.70      |      |               |                 |
|                 | Alelo T    | 0.25      | 0.30      |      |               |                 |
| <i>AGO</i>      | rs636832   | 52        | 66        |      |               |                 |



|                    |            |           |           |       |               |                 |
|--------------------|------------|-----------|-----------|-------|---------------|-----------------|
| <i>pri-let-7a1</i> | GG         | 24 (46.2) | 39 (59.1) | 0.11  | GG vs GA + AA | 0.53(0.24-1.16) |
|                    | GA         | 20 (38.5) | 21 (31.8) |       |               |                 |
|                    | AA         | 8 (15.4)  | 6 (9.1)   | 0.28  | GG + GA vs AA | 0.53(0.16-1.73) |
|                    | Alelo G    | 0.65      | 0.75      |       |               |                 |
|                    | Alelo A    | 0.35      | 0.25      |       |               |                 |
|                    | rs10739971 | 13        | 27        |       |               |                 |
|                    | GG         | 9 (69.2)  | 6 (22.2)  | <0.01 | GG vs GA + AA | 13.3(1.82-90.0) |
|                    | GA         | 3 (23.1)  | 14 (51.9) |       |               |                 |
|                    | AA         | 1 (7.7)   | 7 (25.9)  | 0.09  | GG + GA vs AA | 6.55(0.53-8.90) |
|                    | Alelo G    | 0.81      | 0.48      |       |               |                 |
| <i>miR146A</i>     | Alelo A    | 0.19      | 0.52      |       |               |                 |
|                    | rs2910164  | 52        | 69        |       |               |                 |
|                    | GG         | 23 (44.2) | 29 (42.0) | 0.74  | GG vs GC + CC | 1.14(0.40-1.92) |
|                    | GC         | 23 (44.2) | 35 (50.7) |       |               |                 |
|                    | CC         | 6 (11.5)  | 5 (7.2)   | 0.52  | GG + GC vs CC | 0.65(0.18-2.43) |
|                    | Alelo G    | 0.66      | 0.67      |       |               |                 |
|                    | Alelo C    | 0.34      | 0.33      |       |               |                 |
|                    | rs4143815  | 54        | 69        |       |               |                 |
|                    | GG         | 35 (64.8) | 46 (66.7) | 0.82  | GG vs GC + CC | 1.10(0.49-2.47) |
|                    |            |           |           |       |               |                 |

|                 |           |           |           |        |                  |                  |
|-----------------|-----------|-----------|-----------|--------|------------------|------------------|
|                 | GC        | 17 (31.5) | 19 (27.5) |        |                  |                  |
|                 | CC        | 2 (3.7)   | 4 (5.8)   | 0.32   | GG + GC vs<br>CC | 2.38(0.41-13.01) |
|                 | Alelo G   | 0.80      | 0.80      |        |                  |                  |
|                 | Alelo C   | 0.20      | 0.20      |        |                  |                  |
| <i>miR200B</i>  | rs9660710 | 55        | 67        |        |                  |                  |
|                 | CC        | 42 (76.4) | 55 (82.1) | 0.36   | CC vs CA +<br>AA | 1.27 (0.48-3.37) |
|                 | CA        | 11 (20.0) | 12 (17.9) |        |                  |                  |
|                 | AA        | 2 (3.6)   | 0 (0.00)  | 0.27   | CC + CA vs<br>AA | 0.00 (0.00)      |
|                 | Alelo C   | 0.86      | 0.90      |        |                  |                  |
|                 | Alelo A   | 0.14      | 0.10      |        |                  |                  |
| <i>miR26-A1</i> | rs7372209 | 49        | 62        |        |                  |                  |
|                 | CC        | 19 (38.8) | 33 (53.2) | 0.16   | CC vs CT +<br>TT | 1.78(0.79-3.99)  |
|                 | CT        | 24 (49.0) | 23 (37.1) |        |                  |                  |
|                 | TT        | 6 (12.2)  | 6 (9.7)   | 0.59   | CC + CT vs<br>TT | 1.42(0.39-5.14)  |
|                 | Alelo C   | 0.63      | 0.71      |        |                  |                  |
|                 | Alelo T   | 0.37      | 0.28      |        |                  |                  |
| <i>miR200C</i>  | rs12904   | 54        | 69        |        |                  |                  |
|                 | GG        | 20 (37.0) | 11 (15.9) | < 0.01 | GG vs GA +<br>AA | 3.42(1.36-8.57)  |
|                 | GA        | 25 (46.3) | 45 (65.2) |        |                  |                  |

|                 |            |           |           |             |               |                        |
|-----------------|------------|-----------|-----------|-------------|---------------|------------------------|
| <i>DROSHA</i>   | AA         | 9 (16.7)  | 13 (18.8) | 0.53        | GG + GA vs AA | 1.39(0.50-3.89)        |
|                 | Alelo G    | 0.60      | 0.48      |             |               |                        |
|                 | Alelo A    | 0.30      | 0.52      |             |               |                        |
|                 | rs10035440 | 54        | 69        |             |               |                        |
|                 | TT         | 36 (66.7) | 40 (58.0) | 0.32        | TT vs CT + CC | 1.50(0.66-3.39)        |
|                 | CT         | 17 (31.5) | 27 (39.1) |             |               |                        |
|                 | CC         | 1 (1.9)   | 2 (2.9)   | 0.66        | TT + CT vs CC | 1.73(0.14-7.12)        |
| <i>miR4513</i>  | Alelo T    | 0.82      | 0.77      |             |               |                        |
|                 | Alelo C    | 0.18      | 0.23      |             |               |                        |
|                 | rs2168518  | 55        | 69        |             |               |                        |
|                 | GG         | 26 (47.3) | 43 (62.3) | 0.40        | GG vs GA + AA | 0.71(0.32-1.58)        |
|                 | GA         | 28 (50.9) | 20 (29.0) |             |               |                        |
|                 | AA         | 1 (1.8)   | 6 (8.7)   | <b>0.03</b> | GG + AG vs AA | <b>7.65(0.83-70.5)</b> |
|                 | Alelo G    | 0.73      | 0.77      |             |               |                        |
| <i>miR219-1</i> | Alelo A    | 0.27      | 0.23      |             |               |                        |
|                 | rs107822   | 49        | 64        |             |               |                        |
|                 | CC         | 30 (61.2) | 37 (57.8) | 0.77        | CC vs CT + TT | 0.89(0.40-1.99)        |
|                 | CT         | 12 (24.5) | 23 (35.9) |             |               |                        |
|                 | TT         | 7 (14.3)  | 4 (6.2)   | 0.18        | CC + CT vs TT | 2.50(0.63-9.84)        |

|                |            |           |           |      |               |                  |
|----------------|------------|-----------|-----------|------|---------------|------------------|
| <i>miR2053</i> | Alelo C    | 0.73      | 0.76      | 0.21 | TT vs TC + CC | 0.61(0.28-1.33)  |
|                | Alelo T    | 0.26      | 0.24      |      |               |                  |
|                | rs10505168 | 52        | 66        |      |               |                  |
|                | TT         | 27 (51.9) | 25 (37.9) | 0.55 | TT + CT vs CC | 0.72(0.24-2.19)  |
|                | TC         | 19 (36.5) | 29 (43.9) |      |               |                  |
|                | CC         | 6 (11.5)  | 12 (18.2) |      |               |                  |
| <i>miR499</i>  | Alelo T    | 0.70      | 0.60      | 0.36 | GG vs GA + AA | 1.51(0.62-3.69)  |
|                | Alelo C    | 0.30      | 0.40      |      |               |                  |
|                | rs3746444  | 52        | 69        |      |               |                  |
|                | GG         | 37 (71.2) | 53 (76.8) | 0.27 | GG + GA vs AA | 3.15(0.37-27.04) |
|                | GA         | 12 (23.1) | 14 (20.3) |      |               |                  |
|                | AA         | 3 (5.8)   | 2 (2.9)   |      |               |                  |
|                | Alelo G    | 0.83      | 0.87      |      |               |                  |
|                | Alelo A    | 0.17      | 0.13      |      |               |                  |

\*Sample number; *P*-values, OR and 95%CI were obtained with logistic regression adjusted for genetic ancestry.

**Table S3. Genotypic distribution of the investigated polymorphisms for leprosy patients grouped in clinical form MB in comparison to the control group.**

| ID            | Genotype   | MB (%)    | Control (%) | <i>p</i> -value | Model      | OR (95%CI)    |
|---------------|------------|-----------|-------------|-----------------|------------|---------------|
| <i>miR300</i> | rs12894467 | 54        | 68          | 0.66            | TT vs TC + | 1.02(0.40-1.) |
|               | TT         | 26 (46.4) | 30 (44.1)   |                 |            |               |

|                   |           |           |           |      |                  |                 |
|-------------------|-----------|-----------|-----------|------|------------------|-----------------|
|                   |           |           |           |      | CC               |                 |
|                   | CT        | 21 (37.5) | 26 (38.2) |      |                  |                 |
|                   | CC        | 9 (16.1)  | 12 (17.6) | 0.79 | TT + TC vs<br>CC | 1.12(0.33-2.32) |
|                   | Alelo T   | 0.67      | 0.63      |      |                  |                 |
|                   | Alelo C   | 0.33      | 0.37      |      |                  |                 |
| <i>miR423</i>     | rs6505162 | 44        | 59        |      |                  |                 |
|                   | AA        | 15 (34.1) | 15 (25.4) | 0.40 | AA vs AC +<br>CC | 0.69(0.29-1.65) |
|                   | AC        | 21 (47.7) | 32 (54.2) |      |                  |                 |
|                   | CC        | 8 (18.2)  | 12 (20.3) | 0.96 | AA + AC vs<br>CC | 0.97(0.35-2.73) |
|                   | Alelo A   | 0.58      | 0.53      |      |                  |                 |
|                   | Alelo C   | 0.42      | 0.47      |      |                  |                 |
| <i>mir604</i>     | rs2368392 | 40        | 54        |      |                  |                 |
|                   | AA        | 21 (52.5) | 24 (44.4) | 0.50 | AA vs AG +<br>GG | 0.74(0.30-1.81) |
|                   | AG        | 18 (45.0) | 29 (53.7) |      |                  |                 |
|                   | GG        | 1 (2.5)   | 1 (1.9)   | 0.79 | AA + AG vs<br>GG | 1.46(0.29-1.74) |
|                   | Alelo A   | 0.75      | 0.71      |      |                  |                 |
|                   | Alelo G   | 0.25      | 0.29      |      |                  |                 |
| <i>pre-miR938</i> | rs2505901 | 56        | 68        |      |                  |                 |
|                   | TT        | 15 (26.8) | 27 (39.7) | 0.07 | TT vs TC +<br>CC | 0.49(0.22-1.08) |

|                 |           |           |           |             |                   |                        |
|-----------------|-----------|-----------|-----------|-------------|-------------------|------------------------|
|                 | TC        | 28 (50.0) | 30 (44.1) |             |                   |                        |
|                 | CC        | 13 (23.2) | 11 (16.2) | 0.21        | TT + CT vs<br>CC  | 0.56(0.22-1.42)        |
|                 | Alelo T   | 0.52      | 0.62      |             |                   |                        |
|                 | Alelo C   | 0.48      | 0.38      |             |                   |                        |
| <i>miR100</i>   | rs1834306 | 45        | 58        |             |                   |                        |
|                 | AA        | 20 (44.4) | 25 (43.1) | 0.87        | AA vs AG +<br>GG  | 0.94(0.41-2.12)        |
|                 | AG        | 19 (42.2) | 26 (44.8) |             |                   |                        |
|                 | GG        | 6 (13.3)  | 7 (12.1)  | 0.84        | AA + AG vs<br>GG  | 0.88(0.26-2.98)        |
|                 | Alelo A   | 0.66      |           | 0.65        |                   |                        |
|                 | Alelo G   | 0.34      |           | 0.35        |                   |                        |
| <i>miR219A1</i> | rs213210  | 57        | 69        |             |                   |                        |
|                 | AA        | 49 (86.0) | 58 (84.1) | 0.78        | AA vs AG +<br>GG  | 0.87(0.31-2.41)        |
|                 | AG        | 8 (14.0)  | 9 (13.0)  |             |                   |                        |
|                 | GG        | 0 (0.00)  | 2 (2.9)   | 0.09        | AA vs AG vs<br>GG | 0.00 (0.00)            |
|                 | Alelo A   | 0.93      | 0.90      |             |                   |                        |
|                 | Alelo G   | 0.07      | 0.10      |             |                   |                        |
| <i>DROSHA</i>   | rs639174  | 51        | 64        |             |                   |                        |
|                 | CC        | 16 (31.4) | 30 (46.9) | <b>0.03</b> | CC vs CT +<br>TT  | <b>0.43(0.19-0.98)</b> |
|                 | CT        | 24 (47.1) | 28 (43.8) |             |                   |                        |

|                 |            |           |           |             |               |                        |
|-----------------|------------|-----------|-----------|-------------|---------------|------------------------|
| <i>miR453</i>   | TT         | 11 (21.6) | 6 (9.4)   | 0.08        | CC + CT vs TT | 0.39(0.13-1.18)        |
|                 | Alelo C    | 0.55      | 0.69      |             |               |                        |
|                 | Alelo T    | 0.45      | 0.31      |             |               |                        |
|                 | rs56103835 | 55        | 69        |             |               |                        |
|                 | TT         | 30 (54.5) | 32 (46.4) | 0.47        | TT vs CT + CC | 0.77(0.37-1.59)        |
|                 | CT         | 18 (32.7) | 30 (43.5) |             |               |                        |
|                 | CC         | 7 (12.7)  | 7 (10.1)  | 0.64        | TT + CT vs CC | 1.30(0.42-1.43)        |
| <i>miR196A2</i> | Alelo T    | 0.71      | 0.68      |             |               |                        |
|                 | Alelo C    | 0.29      | 0.32      |             |               |                        |
|                 | rs11614913 | 49        | 66        |             |               |                        |
|                 | CC         | 29 (59.2) | 31 (47.0) | 0.15        | CC vs CT + TT | 1.39(0.29-2.03)        |
|                 | CT         | 17 (34.7) | 30 (45.5) |             |               |                        |
|                 | TT         | 3 (6.1)   | 5 (7.6)   | 0.71        | CC + CT vs TT | 1.32(0.40-4.35)        |
|                 | Alelo C    | 0.76      | 0.70      |             |               |                        |
| <i>AGO</i>      | Alelo T    | 0.24      | 0.30      |             |               |                        |
|                 | rs636832   | 50        | 66        |             |               |                        |
|                 | GG         | 22 (44.0) | 39 (59.1) | <b>0.04</b> | GG vs GA + AA | <b>0.45(0.21-0.99)</b> |
|                 | GA         | 23 (46.0) | 21 (31.8) |             |               |                        |
|                 | AA         | 5 (10.0)  | 6 (9.1)   | 0.98        | GG + GA vs AA | 1.01(0.28-3.61)        |

|                    |            |           |           |             |               |                        |
|--------------------|------------|-----------|-----------|-------------|---------------|------------------------|
| <i>pri-let-7a1</i> | Alelo G    | 0.67      | 0.75      | 0.23        | GG vs GA + AA | 2.54(0.53-12.3)        |
|                    | Alelo A    | 0.33      | 0.25      |             |               |                        |
|                    | rs10739971 | 17        | 27        |             |               |                        |
|                    | GG         | 6 (35.3)  | 6 (22.2)  | 0.13        | GG + GA vs AA | 3.95(0.58-27.1)        |
|                    | GA         | 9 (52.9)  | 14 (51.9) |             |               |                        |
|                    | AA         | 2 (11.8)  | 7 (25.9)  |             |               |                        |
| <i>miR146A</i>     | Alelo G    | 0.62      | 0.48      | 0.74        | GG vs GC + CC | 1.110.53-2.30)         |
|                    | Alelo A    | 0.38      | 0.52      |             |               |                        |
|                    | rs2910164  | 56        | 69        |             |               |                        |
|                    | GG         | 24 (42.9) | 29 (42.0) | 0.66        | GG + GC vs CC | 4.26(0.47-38.5)        |
|                    | GC         | 31 (55.4) | 35 (50.7) |             |               |                        |
|                    | CC         | 1 (1.8)   | 5 (7.2)   |             |               |                        |
| <i>miR570</i>      | Alelo G    | 0.71      | 0.67      | <b>0.03</b> | GG vs GC + CC | <b>0.45(0.21-0.96)</b> |
|                    | Alelo C    | 0.29      | 0.33      |             |               |                        |
|                    | rs4143815  | 57        | 69        |             |               |                        |
|                    | GG         | 27 (47.4) | 46 (66.7) | 0.08        | GG + GC vs CC | 0.34(0.10-1.28)        |
|                    | GC         | 21 (36.8) | 19 (27.5) |             |               |                        |
|                    | CC         | 9 (15.8)  | 4 (5.8)   |             |               |                        |
|                    | Alelo G    | 0.66      | 0.80      |             |               |                        |



|                 |            |           |           |             |                  |                        |
|-----------------|------------|-----------|-----------|-------------|------------------|------------------------|
|                 | Alelo C    | 0.34      | 0.20      |             |                  |                        |
| <i>miR26-A1</i> | rs7372209  | 49        | 62        |             |                  |                        |
|                 | CC         | 25 (51.0) | 33 (53.2) | 0.85        | CC vs CT +<br>TT | 1.40(0.72-2.72)        |
|                 | CT         | 19 (38.8) | 23 (37.1) |             |                  |                        |
|                 | TT         | 5 (10.2)  | 6 (9.7)   | 0.66        | CC + CT vs<br>TT | 1.59(0.51-4.94)        |
|                 | Alelo C    | 0.70      | 0.71      |             |                  |                        |
|                 | Alelo T    | 0.30      | 0.29      |             |                  |                        |
| <i>miR200C</i>  | rs12904    | 57        | 69        |             |                  |                        |
|                 | GG         | 16 (28.1) | 11 (15.9) | 0.06        | GG vs GA +<br>AA | 2.28(0.93-5.58)        |
|                 | GA         | 28 (49.1) | 45 (65.2) |             |                  |                        |
|                 | AA         | 13 (22.8) | 13 (18.8) | 0.73        | GG + GA vs<br>AA | 0.86(0.35-2.11)        |
|                 | Alelo G    | 0.52      | 0.48      |             |                  |                        |
|                 | Alelo A    | 0.48      | 0.52      |             |                  |                        |
| <i>DROSHA</i>   | rs10035440 | 56        | 69        |             |                  |                        |
|                 | TT         | 44 (78.6) | 40 (58.0) | <b>0.01</b> | TT vs CT +<br>CC | <b>2.88(1.22-6.79)</b> |
|                 | CT         | 12 (21.4) | 27 (39.1) |             |                  |                        |
|                 | CC         | 0 (0.0)   | 2 (2.9)   | 0.11        | TT + CT vs<br>CC | 0.00(0.00)             |
|                 | Alelo T    | 0.89      | 0.77      |             |                  |                        |
|                 | Alelo C    | 0.11      | 0.24      |             |                  |                        |

|                 |            |           |           |      |               |                 |
|-----------------|------------|-----------|-----------|------|---------------|-----------------|
| <i>miR4513</i>  | rs2168518  | 57        | 69        |      |               |                 |
|                 | GG         | 25 (43.9) | 43 (62.3) | 0.17 | GG vs GA + AA | 0.57(0.26-1.27) |
|                 | GA         | 25 (43.9) | 20 (29.0) |      |               |                 |
|                 | AA         | 7 (12.3)  | 6 (8.7)   | 0.87 | GG + AG vs AA | 0.91(0.27-3.03) |
|                 | Alelo G    | 0.66      | 0.77      |      |               |                 |
|                 | Alelo A    | 0.34      | 0.23      |      |               |                 |
| <i>miR219-1</i> | rs107822   | 46        | 64        |      |               |                 |
|                 | CC         | 28 (60.9) | 37 (57.8) | 0.59 | CC vs CT + TT | 0.89(0.46-1.74) |
|                 | CT         | 16 (34.8) | 23 (35.9) |      |               |                 |
|                 | TT         | 2 (4.3)   | 4 (6.2)   | 0.54 | CC + CT vs TT | 1.49(0.42-5.25) |
|                 | Alelo C    | 0.78      | 0.76      |      |               |                 |
|                 | Alelo T    | 0.22      | 0.24      |      |               |                 |
| <i>miR2053</i>  | rs10505168 | 53        | 66        |      |               |                 |
|                 | TT         | 18 (34.0) | 25 (37.9) | 0.53 | TT vs TC + CC | 0.87(0.34-1.90) |
|                 | TC         | 26 (49.1) | 29 (43.9) |      |               |                 |
|                 | CC         | 9 (17.0)  | 12 (18.2) | 0.96 | TT + CT vs CC | 0.81(0.34-1.86) |
|                 | Alelo T    | 0.58      | 0.59      |      |               |                 |
|                 | Alelo C    | 0.42      | 0.41      |      |               |                 |
| <i>miR499</i>   | rs3746444  | 57        | 69        |      |               |                 |

|         |           |           |      |               |                  |
|---------|-----------|-----------|------|---------------|------------------|
| GG      | 42 (73.7) | 53 (76.8) | 0.80 | GG vs GA + AA | 1.20(0.57-2.50)  |
| GA      | 14 (24.6) | 14 (20.3) |      |               |                  |
| AA      | 1 (1.8)   | 2 (2.9)   | 0.84 | GG + GA vs AA | 1.62(0.24-10.69) |
| Alelo G | 0.86      | 0.87      |      |               |                  |
| Alelo A | 0.14      | 0.13      |      |               |                  |

\*Sample number; *P*-values, OR and 95%CI were obtained with logistic regression adjusted for genetic ancestry.

**Table S4. Genotypic distribution of the investigated polymorphisms between leprosy patients grouped according clinical form MB and PB.**

| ID            | Genotype   | PB (%)    | MB (%)    | <i>p</i> -value | Model         | OR (95%CI)      |
|---------------|------------|-----------|-----------|-----------------|---------------|-----------------|
| <i>miR300</i> | rs12894467 | 55        | 53        |                 |               |                 |
|               | TT         | 18 (32.7) | 25 (47.2) | 0.09            | TT vs CT + CC | 0.48(0.20-1.14) |
|               | CT         | 24 (43.6) | 20 (37.7) |                 |               |                 |
|               | CC         | 13 (23.6) | 8 (15.1)  | 0.08            | TT + CT vs CC | 0.39(0.13-1.16) |
|               | Alelo T    | 0.54      | 0.66      |                 |               |                 |
|               | Alelo C    | 0.46      | 0.34      |                 |               |                 |
| <i>miR423</i> | rs6505162  | 49        | 41        |                 |               |                 |
|               | AA         | 12 (24.5) | 15 (36.6) | 0.46            | AA vs AC + CC | 0.69(0.26-1.87) |
|               | AC         | 26 (53.1) | 18 (43.9) |                 |               |                 |
|               | CC         | 11 (22.4) | 8 (19.5)  | 0.99            | AA + AC vs CC | 1.00(0.33-3.08) |
|               | Alelo A    | 0.51      | 0.59      |                 |               |                 |

|                   |           |           |           |      |               |                 |
|-------------------|-----------|-----------|-----------|------|---------------|-----------------|
|                   | Alelo C   | 0.49      | 0.41      |      |               |                 |
| <i>mir604</i>     | rs2368392 | 43        | 37        |      |               |                 |
|                   | AA        | 21 (48.8) | 19 (51.4) | 0.52 | AA vs AG + GG | 0.73(0.28-1.94) |
|                   | AG        | 22 (51.2) | 17 (45.9) |      |               |                 |
|                   | GG        | 0 (0.0)   | 1 (2.7)   | 0.14 | AA + AG vs GG | 0.00(0.00)      |
|                   | Alelo A   | 0.74      | 0.74      |      |               |                 |
|                   | Alelo G   | 0.26      | 0.26      |      |               |                 |
| <i>pre-miR938</i> | rs2505901 | 53        | 53        |      |               |                 |
|                   | TT        | 17 (32.1) | 12 (22.6) | 0.18 | TT vs CT + CC | 1.90(0.74-4.90) |
|                   | CT        | 25 (47.2) | 27 (50.9) |      |               |                 |
|                   | CC        | 11 (20.8) | 14 (26.4) | 0.07 | TT + CT vs CC | 2.56(0.89-7.38) |
|                   | Alelo T   | 0.56      | 0.48      |      |               |                 |
|                   | Alelo C   | 0.44      | 0.52      |      |               |                 |
| <i>miR100</i>     | rs1834306 | 48        | 42        |      |               |                 |
|                   | AA        | 24 (50.0) | 18 (42.9) | 0.45 | AA vs AG + GG | 1.41(0.57-3.45) |
|                   | AG        | 17 (35.4) | 19 (45.2) |      |               |                 |
|                   | GG        | 7 (14.6)  | 5 (11.9)  | 0.65 | AA + AG vs GG | 0.74(0.20-2.76) |
|                   | Alelo A   | 0.68      | 0.65      |      |               |                 |
|                   | Alelo G   | 0.32      | 0.35      |      |               |                 |
| <i>DROSHA</i>     | rs639174  | 50        | 48        |      |               |                 |
|                   | CC        | 16 (32.0) | 14 (29.2) | 0.73 | CC vs CT + TT | 0.85(0.32-2.22) |
|                   | CT        | 27 (54.0) | 23 (47.9) |      |               |                 |

|                    |            |           |           |      |               |                 |
|--------------------|------------|-----------|-----------|------|---------------|-----------------|
| <i>miR453</i>      | TT         | 7 (14.0)  | 11 (22.9) | 0.85 | CC + CT vs TT | 1.11(0.35-3.51) |
|                    | Alelo C    | 0.59      | 0.53      |      |               |                 |
|                    | Alelo T    | 0.41      | 0.47      |      |               |                 |
|                    | rs56103835 | 54        | 52        |      |               |                 |
|                    | TT         | 30 (55.6) | 28 (53.8) | 0.69 | TT vs CT + CC | 0.84(0.36-1.96) |
|                    | CT         | 20 (37.0) | 17 (32.7) |      |               |                 |
| <i>miR196A2</i>    | CC         | 4 (7.4)   | 7 (13.5)  | 0.27 | TT + CT vs CC | 2.16(0.53-8.86) |
|                    | Alelo T    | 0.74      | 0.70      |      |               |                 |
|                    | Alelo C    | 0.26      | 0.30      |      |               |                 |
|                    | rs11614913 | 52        | 46        |      |               |                 |
|                    | CC         | 32 (61.5) | 27 (58.7) | 0.59 | CC vs CT + TT | 1.27(0.52-3.08) |
|                    | CT         | 14 (26.9) | 16 (34.8) |      |               |                 |
| <i>AGO</i>         | TT         | 6 (11.5)  | 3 (6.5)   | 0.73 | CC + CT vs TT | 1.27(0.52-3.08) |
|                    | Alelo C    | 0.75      | 0.76      |      |               |                 |
|                    | Alelo T    | 0.25      | 0.24      |      |               |                 |
|                    | rs636832   | 52        | 47        |      |               |                 |
|                    | GG         | 24 (46.2) | 20 (42.6) | 0.52 | GG vs GA + AA | 1.33(0.55-3.18) |
|                    | GA         | 20 (38.5) | 22 (46.8) |      |               |                 |
| <i>pri-let-7a1</i> | AA         | 8 (15.4)  | 5 (10.6)  | 0.97 | GG + GA vs AA | 1.02(0.27-3.80) |
|                    | Alelo G    | 0.65      | 0.66      |      |               |                 |
|                    | Alelo A    | 0.35      | 0.34      |      |               |                 |
|                    | rs10739971 | 13        | 16        |      |               |                 |

|                |           |           |           |             |               |                        |
|----------------|-----------|-----------|-----------|-------------|---------------|------------------------|
| <i>miR146A</i> | GG        | 9 (69.2)  | 6 (37.5)  | <b>0.01</b> | GG vs GA + AA | <b>5.21(1.59-7.86)</b> |
|                | GA        | 3 (23.1)  | 9 (56.2)  |             |               |                        |
|                | AA        | 1 (7.7)   | 1 (6.2)   | 0.55        | GG + GA vs AA | 2.68(0.11-6.46)        |
|                | Alelo G   | 0.81      | 0.65      |             |               |                        |
|                | Alelo A   | 0.19      | 0.36      |             |               |                        |
|                | rs2910164 | 52        | 53        |             |               |                        |
|                | GG        | 23 (44.2) | 24 (45.3) | 0.25        | GG vs GC + CC | 0.60(0.24-1.46)        |
|                | GC        | 23 (44.2) | 28 (52.8) |             |               |                        |
|                | CC        | 6 (11.5)  | 1 (1.9)   | <b>0.04</b> | GG + GC vs CC | <b>0.14(0.01-1.36)</b> |
|                | Alelo G   | 0.66      | 0.72      |             |               |                        |
| <i>miR570</i>  | Alelo C   | 0.34      | 0.28      |             |               |                        |
|                | rs4143815 | 54        | 54        |             |               |                        |
|                | GG        | 35 (64.8) | 26 (48.1) | 0.17        | GG vs GC + CC | 1.79(0.77-4.17)        |
|                | GC        | 17 (31.5) | 20 (37.0) |             |               |                        |
|                | CC        | 2 (3.7)   | 8 (14.8)  | 0.28        | GG + GC vs CC | 2.38(0.44-12.79)       |
|                | Alelo G   | 0.80      | 0.66      |             |               |                        |
|                | Alelo C   | 0.20      | 0.34      |             |               |                        |
| <i>miR200B</i> | rs9660710 | 55        | 45        |             |               |                        |
|                | CC        | 42 (76.4) | 35 (77.8) | 0.98        | CC vs CA + AA | 1.01 (0.35-2.91)       |
|                | CA        | 11 (20.0) | 10 (22.2) |             |               |                        |
|                | AA        | 2 (3.6)   | 0 (0.0)   | 0.10        | CC + CA vs AA | 0.00 (0.00)            |
|                |           |           |           |             |               |                        |

|                 |            |           |            |      |               |                 |
|-----------------|------------|-----------|------------|------|---------------|-----------------|
| <i>miR26-A1</i> | Alelo C    | 0.86      | 0.88       |      |               |                 |
|                 | Alelo A    | 0.14      | 0.11       |      |               |                 |
|                 | rs7372209  | 49        | 46         |      |               |                 |
|                 | CC         | 19 (38.8) | 23 (50.0)  | 0.10 | CC vs CT + TT | 0.47(0.19-1.18) |
|                 | CT         | 24 (49.0) | 18 (39.1)  |      |               |                 |
| <i>miR200C</i>  | TT         | 6 (12.2)  | 5 (10.9)   | 0.52 | CC + CT vs TT | 0.64(0.17-2.50) |
|                 | Alelo C    | 0.63      | 0.70       |      |               |                 |
|                 | Alelo T    | 0.37      | 0.30       |      |               |                 |
|                 | rs12904    | 54        | 54         |      |               |                 |
|                 | GG         | 20 (37.0) | 15 (27.8)  | 0.26 | GG vs AG + AA | 1.66(0.68-4.06) |
| <i>DROSHA</i>   | AG         | 25 (46.3) | 26 (48.1)  |      |               |                 |
|                 | AA         | 9 (16.7)  | 13 (24.1)  | 0.41 | GG + AG vs AA | 1.54(0.54-4.37) |
|                 | Alelo G    | 0.60      | 0.52       |      |               |                 |
|                 | Alelo A    | 0.40      | 0.48       |      |               |                 |
|                 | rs10035440 | 54        | 53         |      |               |                 |
| <i>miR4513</i>  | TT         | 36 (66.7) | 41 (77.4)  | 0.63 | TT vs CT + CC | 0.80(0.31-2.05) |
|                 | CT         | 17 (31.5) | 12 (22.60) |      |               |                 |
|                 | CC         | 1 (1.9)   | 0 (0.0)    | 0.47 | TT + CT vs CC | 0.00(0.00)      |
|                 | Alelo T    | 0.82      | 0.89       |      |               |                 |
|                 | Alelo C    | 0.17      | 0.11       |      |               |                 |
| <i>miR4513</i>  | rs2168518  | 55        | 54         |      |               |                 |
|                 | GG         | 26 (47.3) | 23 (42.6)  | 0.70 | GG vs GA + AA | 1.56(0.80-3.04) |

|                 |            |           |           |      |               |                 |
|-----------------|------------|-----------|-----------|------|---------------|-----------------|
|                 | GA         | 28 (50.9) | 25 (40.3) |      |               |                 |
|                 | AA         | 1 (1.8)   | 6 (11.1)  | 0.09 | GG + GA vs AA | 5.37(0.56-9.89) |
|                 | Alelo G    | 0.73      | 0.66      |      |               |                 |
|                 | Alelo A    | 0.27      | 0.34      |      |               |                 |
| <i>miR219-1</i> | rs107822   | 49        | 43        |      |               |                 |
|                 | CC         | 30 (61.2) | 26 (60.5) | 0.83 | CC vs CT + TT | 0.91(0.36-2.30) |
|                 | CT         | 12 (24.5) | 15 (34.9) |      |               |                 |
|                 | TT         | 7 (14.3)  | 2 (4.7)   | 0.07 | CC + CT vs TT | 0.23(0.04-1.31) |
|                 | Alelo C    | 0.73      | 0.78      |      |               |                 |
|                 | Alelo T    | 0.27      | 0.22      |      |               |                 |
| <i>miR2053</i>  | rs10505168 | 52        | 50        |      |               |                 |
|                 | TT         | 27(51.9)  | 17 (34.0) | 0.06 | TT vs TC + CC | 2.31(0.95-5.61) |
|                 | TC         | 19 (36.5) | 24 (48.0) |      |               |                 |
|                 | CC         | 6 (11.5)  | 9 (18.0)  | 0.51 | TT + TC vs CC | 1.50(0.45-5.06) |
|                 | Alelo T    | 0.70      | 0.58      |      |               |                 |
|                 | Alelo C    | 0.30      | 0.42      |      |               |                 |
| <i>miR499</i>   | rs3746444  | 52        | 54        |      |               |                 |
|                 | GG         | 37 (71.2) | 40 (74.1) | 0.97 | GG vs GA + AA | 1.01(0.39-2.61) |
|                 | GA         | 12 (23.1) | 13 (24.1) |      |               |                 |
|                 | AA         | 3 (5.8)   | 1 (1.9)   | 0.25 | GG + GA vs AA | 0.25(0.02-3.05) |
|                 | Alelo G    | 0.82      | 0.86      |      |               |                 |
|                 | Alelo A    | 0.17      | 0.14      |      |               |                 |

---



\*Sample number; *P*-values, OR and 95%CI were obtained with logistic regression adjusted for age and sex.

**Table S5. Characterization of the polymorphisms studied.**

| Gene                    | ID         | Alleles | Function                           | MAF* |
|-------------------------|------------|---------|------------------------------------|------|
| <i>miR20b/miR-17-5P</i> | rs3660     | C>G     | 3 Prime UTR Variant                | 48%  |
| <i>miR300</i>           | rs12894467 | C>T     | Non-Coding Transcript exon variant | 39%  |
| <i>miR423</i>           | rs6505162  | C>A     | Non-Coding Transcript variant      | 50%  |
| <i>mir604</i>           | rs2368392  | G>A     | Non-Coding Transcript Variant      | 32%  |
| <i>pre-miR938</i>       | rs2505901  | C>T     | Intron Variant                     | 40%  |
| <i>miR605</i>           | rs2043556  | T>C     | Non Coding Transcript Variant      | 25%  |
| <i>miR100</i>           | rs1834306  | A>G     | Intron Variant                     | 45%  |
| <i>miR219A1</i>         | rs213210   | A>G     | Regulatory Region Variant          | 17%  |
| <i>DROSHA</i>           | rs639174   | C>T     | Intron Variant                     | 46%  |
| <i>miR453</i>           | rs56103835 | T> C    | Non-Coding Transcript Exon Variant | 30%  |
| <i>miR196A2</i>         | rs11614913 | C>T     | Non-Coding Transcript Exon Variant | 33%  |
| <i>AGO1</i>             | rs636832   | A>G     | Intron Variant                     | 36%  |
| <i>pri-let-7a-1</i>     | rs10739971 | G>A     | Intron Variant                     | 26%  |
| <i>miR146A</i>          | rs2910164  | C>G     | Mature miRNA Variant               | 29%  |
| <i>miR570</i>           | rs4143815  | G>C     | 3 prime UTR ariant                 | 28%  |
| <i>miR200B</i>          | rs9660710  | A>C     | Regulatory Region Variant          | 10%  |
| <i>miR26-A1</i>         | rs7372209  | C>T     | Intron Variant                     | 20%  |
| <i>miR200C</i>          | rs12904    | G> A    | 3 Prime UTR Variant                | 49%  |
| <i>DROSHA</i>           | rs3805500  | G>A     | Intron Variant                     | 49%  |
| <i>DROSHA</i>           | rs10035440 | T>C     | Intron Variant                     | 15%  |
| <i>miR4513</i>          | rs2168518  | G> A    | Non-Coding Transcript Exon Variant | 24%  |
| <i>miR219-1</i>         | rs107822   | C>T     | TF Binding Site                    | 37%  |
| <i>miR149</i>           | rs2292832  | T>C     | Intron Variant                     | 38%  |
| <i>miR2053</i>          | rs10505168 | C>T     | Non Coding Transcript Variant      | 39%  |

---

|               |           |     |                      |     |
|---------------|-----------|-----|----------------------|-----|
| <i>miR499</i> | rs3746444 | A>G | Mature miRNA Variant | 18% |
|---------------|-----------|-----|----------------------|-----|

---

\*Minor Allele Frequency according 1000 Genomes Project.
